# Supplementary material for: Size-dependence of fullerene-like confinement in catalytic methanol cracking
Source: Royal Society of Chemistry journal article supplement (doi:10.1039/d2nj03053e), 2022-01-01
Supplement: d2nj03053e1.pdf [file d2nj03053e1.pdf]

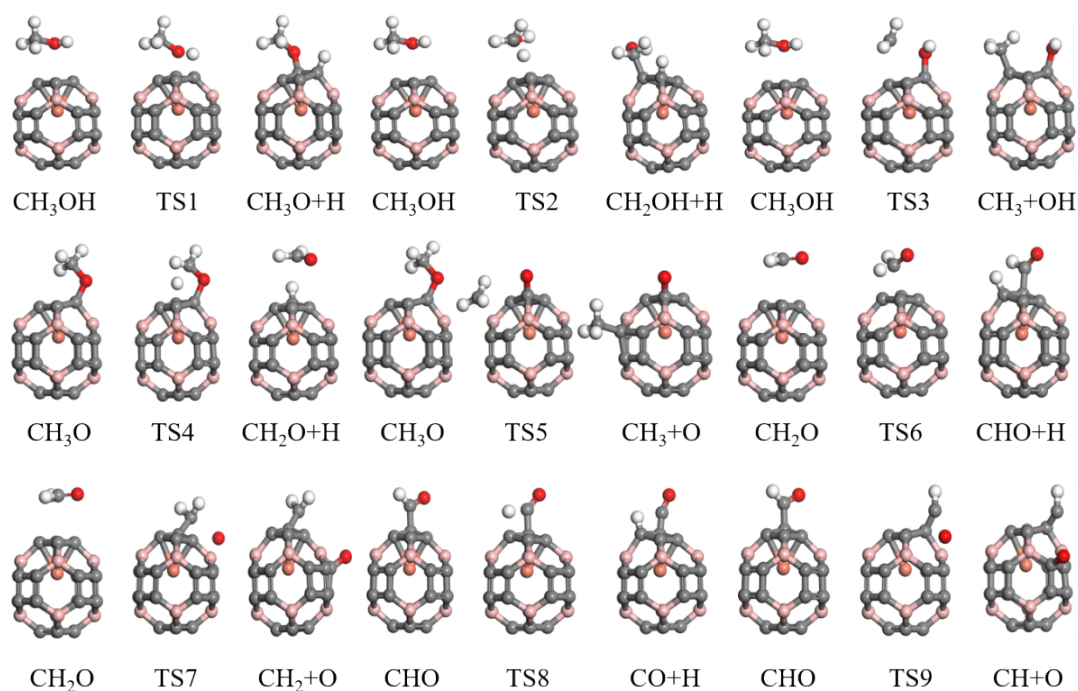

Fig. S1. The configuration of CH<sub>3</sub>OH and corresponding intermediates involved in the CH<sub>3</sub>OH cracking reaction on the Cu@C<sub>24</sub>B<sub>8</sub> surface are shown. Gray, pink, red, and white respectively represent carbon atoms, boron atoms, oxygen atoms, and hydrogen atoms, with Cu atom inside.

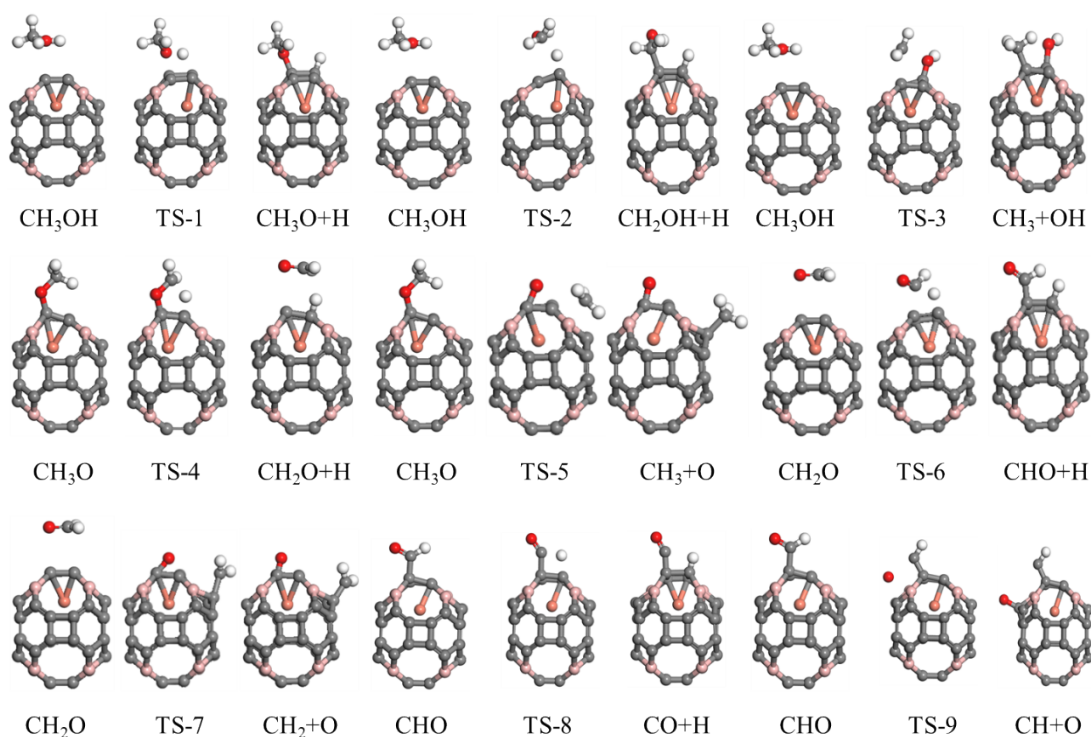

Fig. S2. The configuration of CH<sub>3</sub>OH and corresponding intermediates involved in the CH<sub>3</sub>OH cracking reaction on the Cu@C<sub>40</sub>B<sub>8</sub> surface are shown. Gray, pink, red, and white respectively represent carbon atoms, boron atoms, oxygen atoms, and hydrogen atoms, with Cu atom inside.

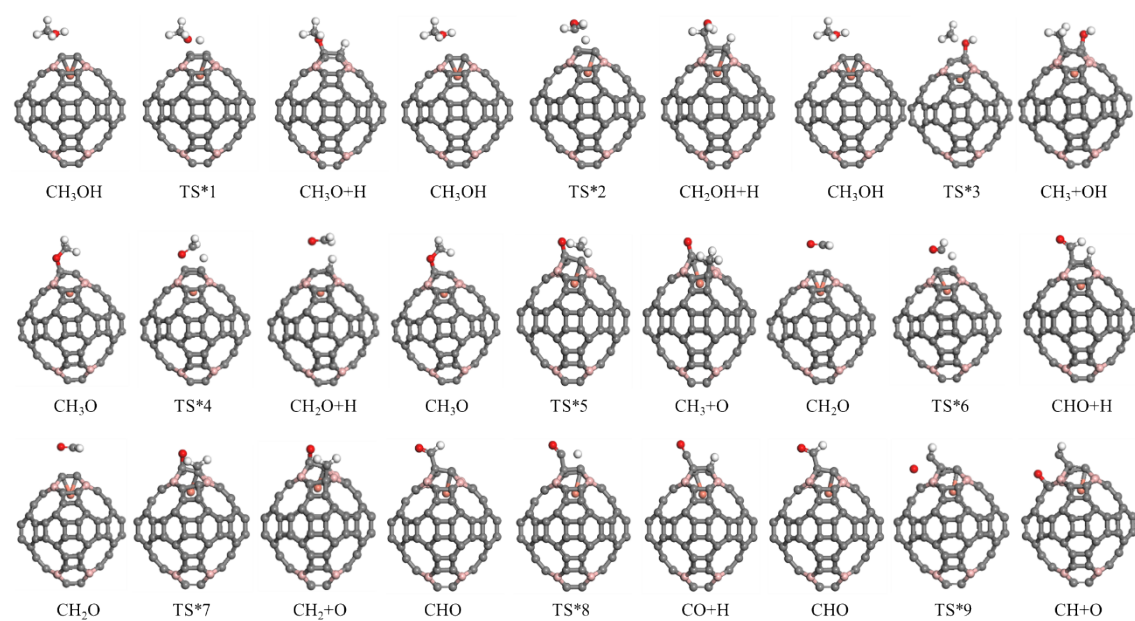

Fig. S3. The configuration of CH<sub>3</sub>OH and corresponding intermediates involved in the CH<sub>3</sub>OH cracking reaction on the Cu@C<sub>88</sub>B<sub>8</sub> surface are shown. Gray, pink, red, and white respectively represent carbon atoms, boron atoms, oxygen atoms, and hydrogen atoms, with Cu atom inside.
